# Supplementary material for: Predicted Prognosis of Patients with Pancreatic Cancer by Machine Learning
Source: Oxford University Press journal article supplement (doi:10.1158/1078-0432.ccr-19-1247), 2020-01-28
Supplement: 10780432ccr191247-sup-220695_3_supp_5964151_q2kxhn.docx [file 10780432ccr191247-sup-220695_3_supp_5964151_q2kxhn.docx]

| Supplementary table 3: Univariate and multivariate analyses for overall survival (Cox proportional hazard model). | | | | | | | | | | | | |
| --- | --- | --- | --- | --- | --- | --- | --- | --- | --- | --- | --- | --- |
| 1. Leave one out cross validation | | | | | | | | | | | | |
|  | Support vector machine | | | | Neural network model | | | | Multinomial log-linear | | | |
|  | multivariate | | univariate | | multivariate | | univariate | | multivariate | | univariate | |
|  | *p* value |  | *p* value |  | *p* value |  | *p* value |  | *p* value |  | *p* value |  |
| prediction | 0.017 | * | 0.001 | ** | <0.001 | *** | <0.001 | *** | 0.140 |  | 0.116 |  |
| T | <0.001 | *** | <0.001 | *** | <0.001 | *** | <0.001 | *** | <0.001 | *** | <0.001 | *** |
| N | 0.952 |  | 0.002 | ** | 0.642 |  | 0.002 | ** | 0.789 |  | 0.002 | ** |
| M | 0.209 |  | 0.097 | . | 0.181 |  | 0.097 | . | 0.097 | . | 0.097 | . |
| Age | 0.103 |  | <0.001 | *** | 0.098 | . | <0.001 | *** | 0.101 |  | <0.001 | *** |
| ASA score | 0.893 |  | <0.001 | *** | 0.787 |  | <0.001 | *** | 0.569 |  | <0.001 | *** |
| chemotherapy | 0.018 | * | <0.001 | *** | 0.046 | * | <0.001 | *** | 0.019 | * | <0.001 | *** |
| co-morbidities | 0.768 |  | 0.205 |  | 0.574 |  | 0.205 |  | 0.886 |  | 0.205 |  |
| 2. 3-fold cross validation | | | | | | | | | | | | |
|  | Support vector machine | | | | Neural network model | | | | Multinomial log-linear | | | |
|  | multivariate | | univariate | | multivariate | | univariate | | multivariate | | univariate | |
|  | *p* value |  | *p* value |  | *p* value |  | *p* value |  | *p* value |  | *p* value |  |
| prediction | 0.002 | ** | <0.001 | *** | <0.001 | *** | <0.001 | *** | 0.010 | * | 0.002 | ** |
| T | <0.001 | *** | <0.001 | *** | <0.001 | *** | <0.001 | *** | <0.001 | *** | <0.001 | *** |
| N | 0.597 |  | 0.002 | ** | 0.701 |  | 0.002 | ** | 0.772 |  | 0.002 | ** |
| M | 0.270 |  | 0.097 | . | 0.192 |  | 0.097 | . | 0.086 |  | 0.097 | . |
| Age | 0.109 |  | <0.001 | *** | 0.093 | . | <0.001 | *** | 0.105 |  | <0.001 | *** |
| ASA score | 0.944 |  | <0.001 | *** | 0.769 |  | <0.001 | *** | 0.737 |  | <0.001 | *** |
| chemotherapy | 0.032 | * | <0.001 | *** | 0.052 | . | <0.001 | *** | 0.041 | * | <0.001 | *** |
| co-morbidities | 0.740 |  | 0.205 |  | 0.491 |  | 0.205 |  | 0.960 |  | 0.205 |  |
| 3. 4-fold cross validation | | | | | | | | | | | | |
|  | Support vector machine | | | | Neural network model | | | | Multinomial log-linear | | | |
|  | multivariate | | univariate | | multivariate | | univariate | | multivariate | | univariate | |
|  | *p* value |  | *p* value |  | *p* value |  | *p* value |  | *p* value |  | *p* value |  |
| prediction | <0.001 | *** | <0.001 | *** | <0.001 | *** | <0.001 | *** | 0.085 | . | <0.001 | *** |
| T | <0.001 | *** | <0.001 | *** | <0.001 | *** | <0.001 | *** | <0.001 | *** | <0.001 | *** |
| N | 0.799 |  | 0.002 | ** | 0.702 |  | 0.002 | ** | 0.986 |  | 0.002 | ** |
| M | 0.149 |  | 0.097 | . | 0.185 |  | 0.097 | . | 0.095 | . | 0.097 | . |
| Age | 0.091 | . | <0.001 | *** | 0.096 | . | <0.001 | *** | 0.120 |  | <0.001 | *** |
| ASA score | 0.906 |  | <0.001 | *** | 0.832 |  | <0.001 | *** | 0.601 |  | <0.001 | *** |
| chemotherapy | 0.019 | * | <0.001 | *** | 0.046 | * | <0.001 | *** | 0.027 | * | <0.001 | *** |
| co-morbidities | 0.880 |  | 0.205 |  | 0.520 |  | 0.205 |  | 0.944 |  | 0.205 |  |
| 4. 10-fold cross validation | | | | | | | | | | | | |
|  | Support vector machine | | | | Neural network model | | | | Multinomial log-linear | | | |
|  | multivariate | | univariate | | multivariate | | univariate | | multivariate | | univariate | |
|  | p value |  | *p* value |  | *p* value |  | *p* value |  | *p* value |  | *p* value |  |
| prediction | <0.001 | *** | <0.001 | *** | <0.001 | *** | <0.001 | *** | 0.015 | * | 0.006 | ** |
| T | <0.001 | *** | <0.001 | *** | <0.001 | *** | <0.001 | *** | <0.001 | *** | <0.001 | *** |
| N | 0.841 |  | 0.002 | ** | 0.707 |  | 0.002 | ** | 0.906 |  | 0.002 | ** |
| M | 0.173 |  | 0.097 | . | 0.186 |  | 0.097 | . | 0.072 | . | 0.097 | . |
| Age | 0.101 |  | <0.001 | *** | 0.094 | . | <0.001 | *** | 0.107 |  | <0.001 | *** |
| ASA score | 0.805 |  | <0.001 | *** | 0.793 |  | <0.001 | *** | 0.622 |  | <0.001 | *** |
| chemotherapy | 0.014 | * | <0.001 | *** | 0.049 | * | <0.001 | *** | 0.018 | * | <0.001 | *** |
| co-morbidities | 0.670 |  | 0.205 |  | 0.516 |  | 0.205 |  | 0.781 |  | 0.205 |  |
| 5. Test cohort | | | | | | | | | | | | |
|  | Support vector machine | | | | Neural network model | | | | Multinomial log-linear | | | |
|  | multivariate | | univariate | | multivariate | | univariate | | multivariate | | univariate | |
|  | *p* value |  | *p* value |  | *p* value |  | *p* value |  | *p* value |  | *p* value |  |
| prediction | 0.059 | . | <0.001 | *** | 0.011 | * | <0.001 | *** | 0.135 |  | 0.070 | . |
| T | 0.002 | ** | <0.001 | *** | 0.002 | ** | <0.001 | *** | 0.001 | ** | <0.001 | *** |
| N | 0.347 |  | 0.083 | . | 0.325 |  | 0.083 | . | 0.459 |  | 0.083 | . |
| M | 0.765 |  | 0.656 |  | 0.679 |  | 0.656 |  | 0.825 |  | 0.656 |  |
| Age | 0.285 |  | <0.001 | *** | 0.298 |  | <0.001 | *** | 0.362 |  | <0.001 | *** |
| ASA score | 0.836 |  | 0.002 | ** | 0.720 |  | 0.002 | ** | 0.704 |  | 0.002 | ** |
| chemotherapy | 0.044 | * | <0.001 | *** | 0.035 | * | <0.001 | *** | 0.073 | . | <0.001 | *** |
| co-morbidities | 0.729 |  | 0.074 | . | 0.736 |  | 0.074 | . | 0.926 |  | 0.074 | . |
